# Supplementary material
Source: MDPI journal article supplement (https://www.mdpi.com/2076-3417/12/23/12500)
Supplement: s1 [file s1]

# Enhanced Photocatalytic Performance of Bi<sub>2</sub>O<sub>2</sub>CO<sub>3</sub> loaded Activated Carbon for Toluene Removal in Air

Xiaoyan Wang<sup>1</sup>, Lu Chen<sup>1</sup>, Changfu Li<sup>1</sup>, Yongchao Xiao<sup>1</sup>, Yuchen Gao<sup>1</sup>, Yaochun Liu<sup>2</sup>, Yuanhua Lin<sup>3,\*</sup> and Junping Ding<sup>1,\*</sup>

<sup>1</sup> China Astronaut Research and Training Center, Beijing100094, China; wangxuyan2010@163.com (X.W.); accchenlu@163.com (L.C.); lichangfu628@163.com (C.L.); ismexiaoxiao@163.com (Y.X.); accgao@163.com (Y.G.); djp15@tsinghua.org.cn (J.D.)

<sup>2</sup> Foshan (Southern China) Institute for New Materials, Foshan528200, China; liuyaoch@126.com (Y.L.)

<sup>3</sup>State Key Laboratory of New Ceramics and Fine Processing, School of Materials Science and Engineering, Tsinghua University, Beijing 100084, China; linyh@mail.tsinghua.edu.cn (Y.L.)

\* Correspondence: linyh@mail.tsinghua.edu.cn (Y.L.); djp15@tsinghua.org.cn (J.D.); Tel.: +86-10-6636-5775 (J.D.)

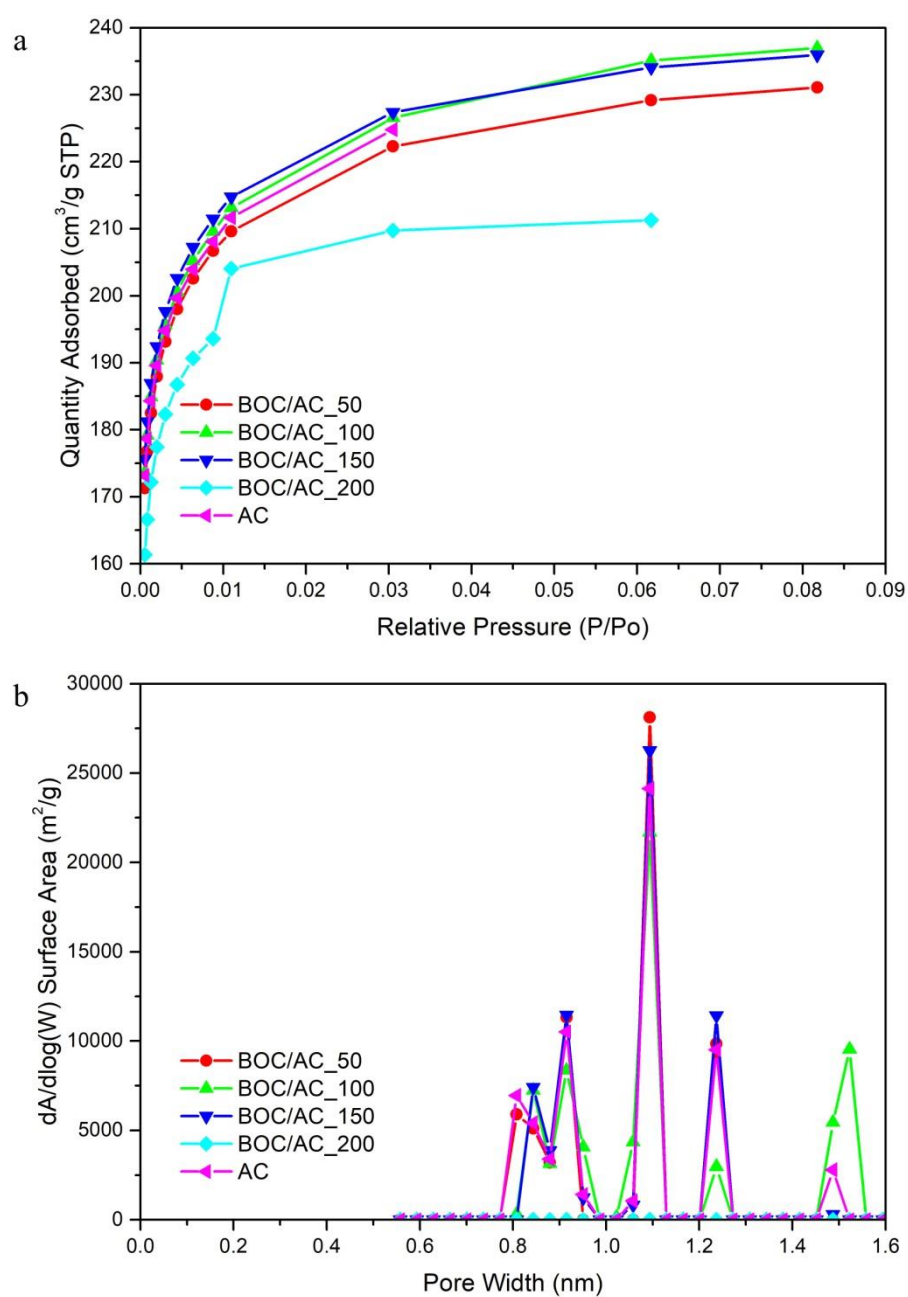

**Figure S1.** N<sub>2</sub> adsorption– desorption isotherms (a) and pore size distributions (b) of AC and BOC/AC composites.

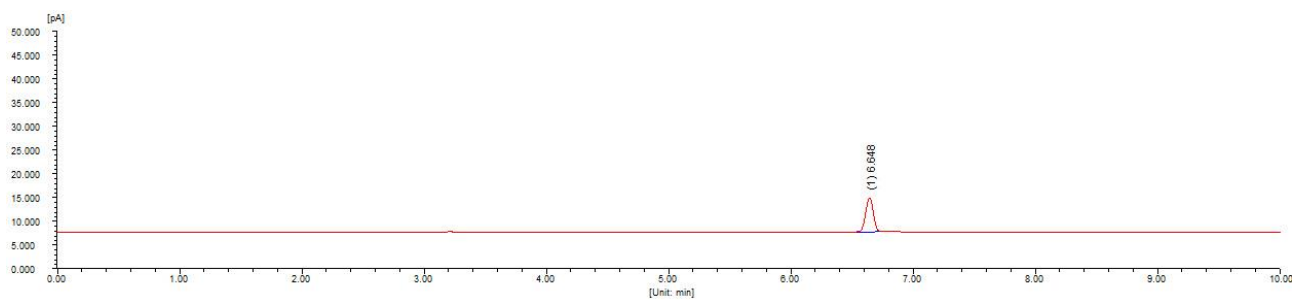

a

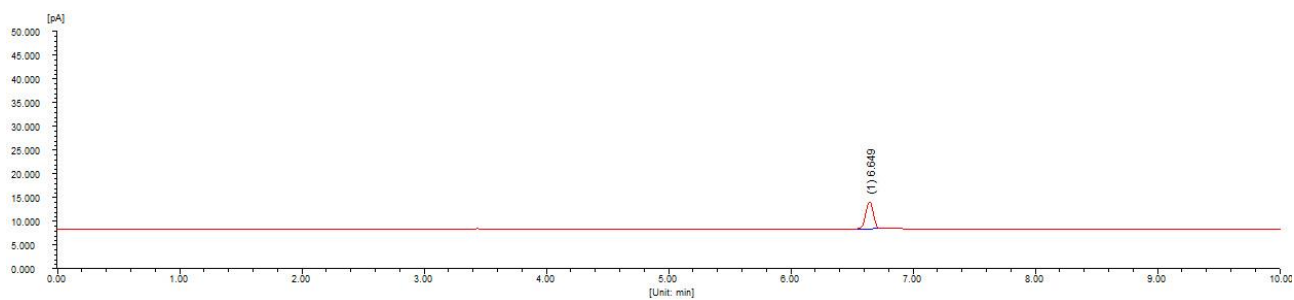

b

**Figure S2.** Chromatograms of organic products at 3 h for BOC/AC<sub>100</sub> (a) and AC (b).

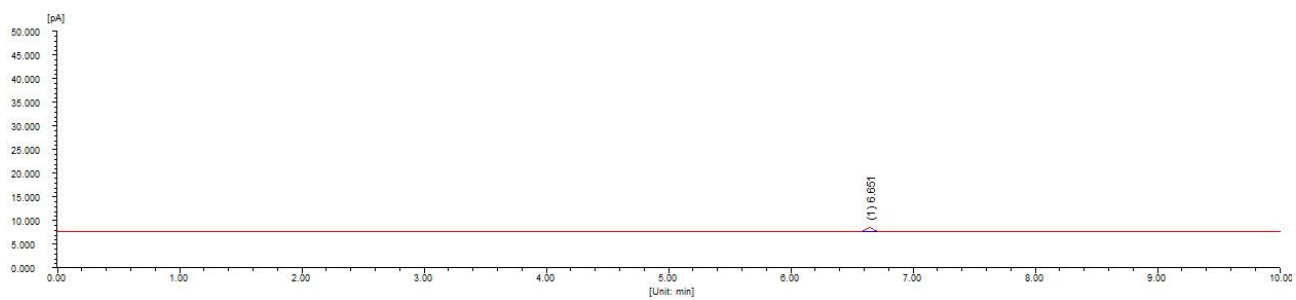

a

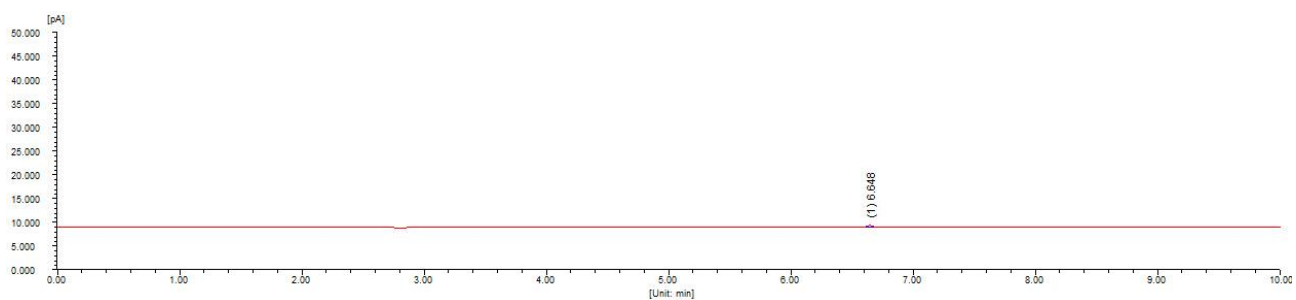

b

**Figure S3.** Chromatograms of organic products at 7 h for BOC/AC<sub>100</sub> (a) and AC (b)

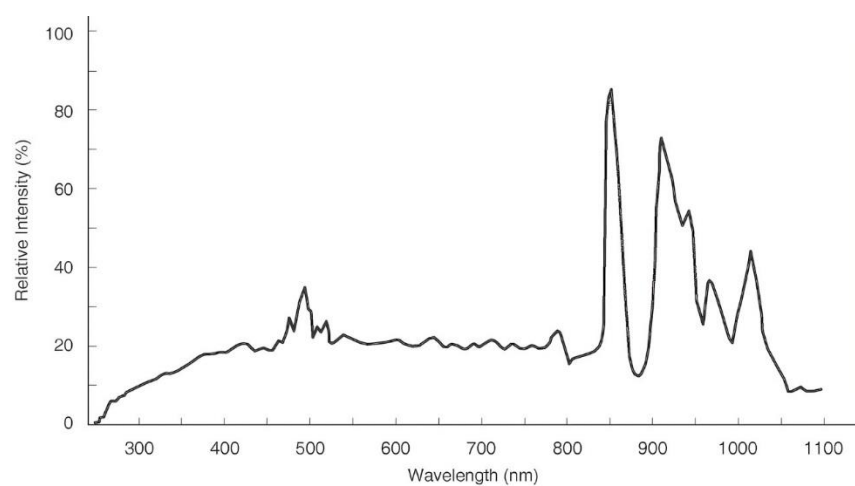

**Figure S4.** Spectrum of the xenon lamp used.
